# Supplementary material
Source: HighWire-hosted journal article supplement (https://bmjopenquality.bmj.com/highwire/filestream/135965/field_highwire_adjunct_files/1/ds3522.docx)
Supplement: ds3522.docx [file ds3522.docx]

**Appendix B: Intervention Results Tables & Figures**


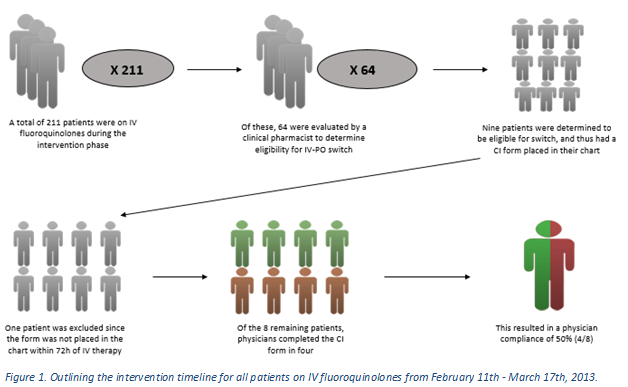


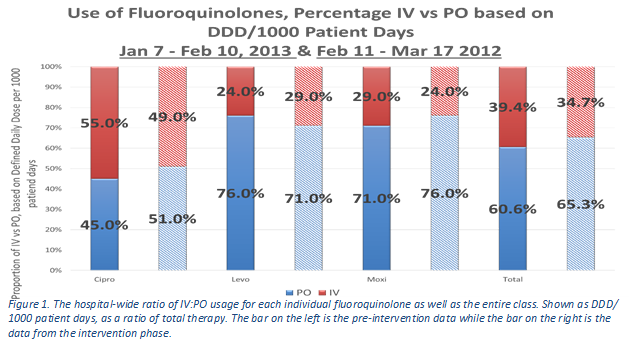


Table 2. Comparison of patient outcome data between the individuals who had the attending physician complete the Clinical Intervention form to those who did not.

|  | Physician Compliance | Non Physician Compliance |
| --- | --- | --- |
| No. of patients | 4 | 4 |
| Average days IV | 3 | 4.25 |
| Average days PO | 3 | 2.75 |
| Ratio IV:PO | 1:1 | 1.55:1 |
| 4+ days on IV abx | 1 | 3 |
